# Supplementary material for: Ischemic postconditioning and pinacidil suppress calcium overload in anoxia-reoxygenation cardiomyocytes via down-regulation of the calcium-sensing receptor
Source: PeerJ. 2016 Nov 1;4:e2612. doi: 10.7717/peerj.2612 (PMC5101590; doi:10.7717/peerj.2612)
Supplement: Supplemental Information 1 [file peerj-04-2612-s001.xlsx]

## Sheet: Sheet1
Fig. 2M
Control	A/R	IPC	PPC (10 μM)	PPC (30 μM)	PPC (100 μM)	Glibenclamide+IPC	Spermine+IPC	A/R+Glibenclamide	A/R+Spermine
32.12	107.55	60.74	119.75	53.96	100.44	136.86	112.34	68.39	140.28
35.95	107.35	43.64	81.39	62.52	70.79	147.71	111.51	128.13	128.74
27.2	98.51	50.25	85.52	50.14	69.73	147.26	133.57	106.72	125.66
29.84	118.54	49.51	124.4	46.97	76.15	157.75	104.63	117.24	123.96
43.68	108.1	53.83	99.62	45.4	65.55	137.02	142.77	84.28	56.03
28.44	116.41	51.29	116.73	37	59.66	85.77	103.49	119.86	108.54
24.49	116	56.69	101.24	38.28	95.35	90.59	116.91	92.53	117.18
24.65	88.41	58.37	112.85	46.54	72.49	83.57	110.33	91.82	86.49
22.59	104.85	69.43	108.81	43.78	87.56	71.94	133.36	105.51	124
22.55	84.02	77.1	110.2	35.63	82.3	86.56	120.25	101.78	107.65
24.77	148.14	59.69	115.46	50.28	105.3	97.78	94.47	140.27	54.49
23.79	113.39	54.09	115.73	45.44	84.24	91.72	102.01	109.85	89.21
22.94	126.03	53.68	131.88	36.82	75.32	68.39	140.28	142.63	105.83
19.47	129.26	53.88	92.04	32.91	77.69	118.18	128.74	95.17	62.86
20.73	137.05	52.81	59.83	35.17	59.06	116.72	125.66	107.01	77.97
27.43	125.02	76.68	59.01	28.87	45.09	117.24	123.96	118.1	84.16
20.32	83.44	56.7	56.52	39.1	80.33	84.28	56.03	84.28	56.03
22.73	89.71	50.58	54.58	31.89	76.76	119.86	108.54	119.86	128.5
25.59	72.88	52.68	73.15	39.49	80.61	92.53	117.18	92.53	117.18
18.47	74.76	46.86	59.84	27.89	49.34	71.87	86.49	71.87	86.49
17.95	94.85	55.29	56.16	38.03	81.92	105.51	124	105.51	124
24.17	58.06	48.57	42.32	36.31	42.29	101.78	107.65	101.78	107.65
21.37	127.85	34.9	55.26	64.09	33.24	140.27	54.49	140.27	74.49
18.62	116.27	53.72	64.54	50.58	30.34	119.82	69.51	119.82	69.51
18.36	152.42	56.29	62.29	70.51	28.51	142.63	105.83	142.63	105.83
Fig. 2N
Control	A/R	IPC	PPC (30 μM)	Glibenclamide+IPC	Spermine+IPC	A/R+Glibenclamide	A/R+Spermine
0.35	0.22	0.35	0.25	0.11	0.1	0.2	0.32
0.28	0.19	0.28	0.28	0.22	0.18	0.18	0.14
0.22	0.26	0.32	0.32	0.3	0.16	0.24	0.26
0.56	0.18	0.26	0.36	0.11	0.22	0.3	0.15
0.4	0.15	0.42	0.4	0.15	0.12	0.15	0.15
0.38	0.23	0.38	0.39	0.23	0.18	0.19	0.28
Fig 3
Control	A/R	IPC	PPC (30 μM)	Glibenclamide+IPC	Spermine+IPC	A/R+Glibenclamide	A/R+Spermine
57.56	139.78	79.86	84.12	137.56	157.5	121.23	132.59
95.29	123.75	64.64	72.38	123.95	123.95	117.14	143.35
35.6	142.4	129.15	107.34	142.4	142.4	132.22	142.33
89.63	162.83	73.77	81.79	162.83	162.83	119.21	172.05
94.42	118.28	66.47	93.36	108.88	113.64	118.17	108.23
25.71	151.4	75.81	54.55	121.45	151.4	110.03	161.25
Fig 4
Control	A/R	IPC	PPC (30 μM)	Glibenclamide+IPC	Spermine+IPC	A/R+Glibenclamide	A/R+Spermine
0.15	0.52	0.26	0.28	0.55	0.38	0.59	0.55
0.13	0.39	0.29	0.25	0.42	0.6	0.6	0.48
0.1	0.49	0.22	0.31	0.47	0.51	0.54	0.59
